# Supplementary material for: In Vitro Antibacterial Activities of the Tibetan Herbal Medicines Against the Staphylococcus Isolated From Mastitis of Guanzhong Dairy Goat
Source: Research Square preprint supplement (doi:10.21203/rs.3.rs-655812/v1), 2021-07-22
Supplement: Supplementary file 1 [file 18bbf43584666c15a05ce0ee.docx]

Supplementary Table S1. Antibiotic susceptibilities (MICs in μg/mL) of 55 Staphylococcus isolates to 9 antimicrobial agents, detected by broth microdilution.

| **Isolate** | **PEN** | **AMO** | **CEF** | **CET** | **AMK** | **CLI** | **CIP** | **ACR** | **DOX** |
| --- | --- | --- | --- | --- | --- | --- | --- | --- | --- |
| ***S. aureus*** |  |  |  |  |  |  |  |  |  |
| **01** | 8 | 4 | 8 | 1 | 0.125 | 8 | 0.125 | 0.25 | 0.125 |
| **02** | 16 | 4 | 16 | 1 | 0.5 | 8 | 0.125 | 0.25 | 0.25 |
| **03** | 16 | 8 | 16 | 4 | 0.5 | 16 | 0.25 | 0.125 | 0.125 |
| **04** | 8 | 16 | 16 | 2 | 1 | 32 | 0.5 | 2 | 0.25 |
| **05** | 32 | 16 | 32 | 8 | 4 | 32 | 1 | 2 | 0.5 |
| **06** | 32 | 32 | 32 | 8 | 4 | 16 | 0.25 | 0.5 | 4 |
| **07** | 32 | 32 | 16 | 4 | 4 | 32 | 2 | 2 | 4 |
| **08** | 16 | 8 | 16 | 8 | 1 | 8 | 8 | 1 | 0.25 |
| **09** | 8 | 8 | 8 | 4 | 0.25 | 8 | 4 | 1 | 0.25 |
| **10** | 16 | 16 | 32 | 8 | 4 | 16 | 8 | 0.5 | 1 |
| **11** | 32 | 32 | 32 | 4 | 8 | 16 | 4 | 0..5 | 2 |
| **12** | 32 | 16 | 32 | 8 | 16 | 16 | 2 | 0.25 | 4 |
| **13** | 32 | 32 | 32 | 8 | 4 | 8 | 4 | 0.25 | 0.5 |
| **14** | 8 | 4 | 8 | 2 | 0.125 | 8 | 0.25 | 0.5 | 0.25 |
| **15** | 8 | 4 | 16 | 2 | 0.125 | 8 | 0.5 | 0.5 | 0.25 |
| **16** | 8 | 8 | 16 | 4 | 0.5 | 8 | 0.5 | 0.25 | 1 |
| **17** | 32 | 16 | 16 | 4 | 1 | 16 | 2 | 0.5 | 0.5 |
| **18** | 16 | 16 | 16 | 4 | 1 | 16 | 1 | 0.5 | 0.25 |
| **19** | 32 | 32 | 16 | 2 | 1 | 16 | 4 | 0.5 | 1 |
| **20** | 8 | 4 | 8 | 2 | 0.125 | 8 | 0.25 | 0.25 | 0.125 |
| **21** | 32 | 32 | 32 | 8 | 1 | 8 | 0.5 | 1 | .25 |
| **22** | 32 | 32 | 32 | 4 | 2 | 8 | 2 | 1 | 0.25 |
| **23** | 32 | 8 | 16 | 2 | 2 | 16 | 2 | 0.5 | 0.125 |
| **24** | 16 | 8 | 16 | 2 | 4 | 32 | 0.5 | 0.25 | 1 |
| **25** | 16 | 8 | 16 | 1 | 1 | 16 | 4 | 0.25 | 0.25 |
| **26** | 8 | 4 | 16 | 1 | 0.125 | 8 | 0.5 | 0.5 | 0.25 |
| ***S. haemolyticus*** |  |  |  |  |  |  |  |  |  |
| **01** | 8 | 8 | 8 | 1 | 0.125 | 1 | 2 | 0.25 | 0.25 |
| **02** | 8 | 16 | 16 | 4 | 0.25 | 2 | 2 | 0.5 | 0.25 |
| **03** | 16 | 16 | 32 | 16 | 8 | 1 | 4 | 0.5 | 0.5 |
| **04** | 32 | 16 | 32 | 8 | 0.5 | 16 | 8 | 8 | 1 |
| **05** | 16 | 32 | 64 | 4 | 0.5 | 2 | 2 | 4 | 2 |
| **06** | 8 | 16 | 32 | 8 | 4 | 1 | 2 | 2 | 0.5 |
| **07** | 16 | 8 | 16 | 2 | 2 | 2 | 2 | 0.5 | 0.25 |
| **08** | 16 | 8 | 32 | 2 | 0.5 | 4 | 4 | 1 | 1 |
| **09** | 8 | 8 | 16 | 1 | 1 | 1 | 4 | 0.25 | 0.5 |
| **10** | 8 | 16 | 8 | 1 | 1 | 1 | 2 | 0.25 | 0.25 |
| ***S. epidermidis*** |  |  |  |  |  |  |  |  |  |
| **01** | 32 | 16 | 32 | 8 | 32 | 4 | 32 | 4 | 8 |
| **02** | 64 | 32 | 64 | 4 | 16 | 2 | 16 | 8 | 16 |
| **03** | 16 | 64 | 128 | 32 | 64 | 8 | 64 | 16 | 32 |
| **04** | 32 | 64 | 64 | 8 | 128 | 8 | 32 | 4 | 256 |
| **05** | 16 | 8 | 16 | 2 | 32 | 4 | 16 | 2 | 64 |
| **06** | 64 | 32 | 64 | 4 | 16 | 4 | 16 | 2 | 16 |
| ***S. saprophyticus*** |  |  |  |  |  |  |  |  |  |
| **01** | 32 | 64 | 128 | 16 | 256 | 32 | 32 | 8 | 256 |
| **02** | 8 | 32 | 256 | 32 | 128 | 16 | 64 | 16 | 128 |
| **03** | 4 | 16 | 16 | 8 | 1 | 4 | 2 | 1 | 64 |
| **04** | 16 | 16 | 16 | 2 | 16 | 8 | 8 | 4 | 64 |
| **05** | 8 | 32 | 64 | 8 | 16 | 4 | 8 | 4 | 128 |
| ***S. gallinarum*** |  |  |  |  |  |  |  |  |  |
| **01** | 16 | 32 | 128 | 64 | 64 | 16 | 16 | 16 | 128 |
| **02** | 32 | 8 | 64 | 128 | 32 | 32 | 32 | 4 | 256 |
| **03** | 4 | 8 | 16 | 4 | 1 | 8 | 1 | 4 | 4 |
| **04** | 16 | 16 | 16 | 64 | 32 | 8 | 16 | 16 | 128 |
| ***S. galilis*** |  |  |  |  |  |  |  |  |  |
| **01** | 16 | 16 | 64 | 16 | 0.5 | 4 | 128 | 8 | 4 |
| ***S. coni*** |  |  |  |  |  |  |  |  |  |
| **01** | 32 | 32 | 64 | 32 | 128 | 32 | 64 | 16 | 256 |
| ***S. simulans*** |  |  |  |  |  |  |  |  |  |
| **01** | 256 | > 256 | 128 | 128 | > 256 | > 256 | 64 | 8 | 256 |
| ***S. equorum*** |  |  |  |  |  |  |  |  |  |
| **01** | 16 | 16 | 16 | 32 | 4 | 8 | 8 | 2 | 64 |
| **ATCC 25923** |  |  |  |  |  |  |  |  |  |
|  | 0.5 | 0.125 | 0.5 | 0.25 | 0.125 | 0.125 | 0.5 | 0.25 | 0.5 |

PEN, Penicillin; AMO, Amoxicillin; CEF, Ceftriaxone; CET, Ceftiofur, AMK, Amikacin;

CLI, Clindanlycin; CIP, Ciprofloxacin; ACR, Acetylisovale-ryltylosin; DOX, Doxycycline

Supplementary Table S2. Inhibition zone (mm) of six Tibetan medicinal plants to 55 Staphylococcus isolates, detected by Kirby-Bauer disc diffusion.

| **Isolate** | *Lagotis*  *brachystachy* | *Aconitum flavum* | *Uncaria*  *rhynchophylla* | *Swertia bimaculata* | *Dracocephalum*  *tanguticum* | *Gentiana*  *urnula* | *Lonicera japonica* |
| --- | --- | --- | --- | --- | --- | --- | --- |
| ***S. aureus*** |  |  |  |  |  |  |  |
| **01** | 22.6 | 19.8 | 17.6 | 14.4 | 13.8 | 11.2 | 15.4 |
| **02** | 21.5 | 20.3 | 17.9 | 13.6 | 14.4 | 10.9 | 15.8 |
| **03** | 22.6 | 18.7 | 14.2 | 13.8 | 12.9 | 12.5 | 14.8 |
| **04** | 23.4 | 19.5 | 15.3 | 12.7 | 13.6 | 13.2 | 16.2 |
| **05** | 19.8 | 16.7 | 14.9 | 4.6 | 12.5 | 9.6 | 14.8 |
| **06** | 19.3 | 16.8 | 15.2 | 14.0 | 13.6 | 9.1 | 15.2 |
| **07** | 20.4 | 18.9 | 14.8 | 12.2 | 14.7 | 11.2 | 14.4 |
| **08** | 21.6 | 17.7 | 14.8 | 13.4 | 15.1 | 11.9 | 16.2 |
| **09** | 22.9 | 19.8 | 16.2 | 13.1 | 14.9 | 12.4 | 17.1 |
| **10** | 25.5 | 20.0 | 17.1 | 15.0 | 15.7 | 13.2 | 17.9 |
| **11** | 19.8 | 15.1 | 16.0 | 14.7 | 14.2 | 12.6 | 16.8 |
| **12** | 21.3 | 18.3 | 15.8 | 13.4 | 13.8 | 11.4 | 16.4 |
| **13** | 20.4 | 16.7 | 14.4 | 13.8 | 12.8 | 10.8 | 15.3 |
| **14** | 22.8 | 19.4 | 13.9 | 12.8 | 13.7 | 13.9 | 17.5 |
| **15** | 23.6 | 18.4 | 14.3 | 14.6 | 14.6 | 9.6 | 18.0 |
| **16** | 21.9 | 18.7 | 18.3 | 13.5 | 15.0 | 10.3 | 17.7 |
| **17** | 21.3 | 17.5 | 17.6 | 13.7 | 15.2 | 11.0 | 15.6 |
| **18** | 22.0 | 16.9 | 15.5 | 14.1 | 14.7 | 9.8 | 14.4 |
| **19** | 19.9 | 15.9 | 13.3 | 12.9 | 14.4 | 10.5 | 15.6 |
| **20** | 24.9 | 16.7 | 15.5 | 12.6 | 13.0 | 11.1 | 17.6 |
| **21** | 23.8 | 17.1 | 16.7 | 13.2 | 14.2 | 12.6 | 14.9 |
| **22** | 22.7 | 18.4 | 17.0 | 14.7 | 13.6 | 13.2 | 15.6 |
| **23** | 25.1 | 19.4 | 14.8 | 13.5 | 15.2 | 11.8 | 16.9 |
| **24** | 22.6 | 19.6 | 15.3 | 12.6 | 14.7 | 12.5 | 15.5 |
| **25** | 21.4 | 18.2 | 16.2 | 15.3 | 13.8 | 10.8 | 17.2 |
| **26** | 22.7 | 18.4 | 16.8 | 13.1 | 15.5 | 11.4 | 16.0 |
| ***S. haemolyticus*** |  |  |  |  |  |  |  |
| **01** | 19.6 | 18.4 | 14.4 | 10.8 | 10.6 | 9.6 | 15.2 |
| **02** | 18.8 | 17.5 | 15.6 | 11.2 | 11.3 | 10.1 | 13.9 |
| **03** | 19.4 | 17.6 | 15.5 | 14.6 | 11.5 | 11.3 | 15.8 |
| **04** | 22.3 | 18.8 | 14.9 | 15.8 | 13.1 | 9.4 | 16.4 |
| **05** | 23.5 | 19.8 | 16.2 | 12.6 | 10.9 | 10.3 | 16.7 |
| **06** | 24.2 | 19.1 | 13.9 | 13.7 | 14.7 | 12.5 | 15.8 |
| **07** | 23.9 | 18.6 | 13.5 | 13.0 | 12.5 | 9.7 | 13.2 |
| **08** | 21.6 | 16.2 | 15.1 | 10.0 | 10.8 | 11.4 | 14.5 |
| **09** | 20.7 | 17.5 | 16.4 | 11.4 | 9.3 | 9.1 | 16.6 |
| **10** | 18.2 | 17.1 | 15.7 | 12.2 | 12.0 | 10.4 | 17.8 |
| ***S. epidermidis*** |  |  |  |  |  |  |  |
| **01** | 22.3 | 15.1 | 15.2 | 10.2 | 12.5 | 9.8 | 15.7 |
| **02** | 24.6 | 14.6 | 16.4 | 12.5 | 13.5 | 8.5 | 16.5 |
| **03** | 25.3 | 15.0 | 16.8 | 15.4 | 12.8 | 8.8 | 14.3 |
| **04** | 23.8 | 18.4 | 17.3 | 16.9 | 13.0 | 10.0 | 13.9 |
| **05** | 19.2 | 19.4 | 14.2 | 15.6 | 11.3 | 7.3 | 12.0 |
| **06** | 24.5 | 17.6 | 11.1 | 14.5 | 12.9 | 8.2 | 14.6 |
| ***S. saprophyticus*** |  |  |  |  |  |  |  |
| **01** | 23.5 | 17.9 | 13.3 | 12.5 | 11.5 | 9.4 | 13.8 |
| **02** | 24.3 | 18.2 | 15.2 | 10.2 | 11.8 | 9.8 | 12.3 |
| **03** | 22.8 | 18.8 | 14.7 | 13.4 | 12.2 | 11.5 | 15.6 |
| **04** | 23.1 | 16.4 | 16.0 | 14.3 | 10.2 | 10.6 | 17.7 |
| **05** | 16.2 | 14.2 | 11.3 | 11.5 | 12.6 | 10.4 | 14.8 |
| ***S. gallinarum*** |  |  |  |  |  |  |  |
| **01** | 22.4 | 14.4 | 12.5 | 12.5 | 13.2 | 8.9 | 12.3 |
| **02** | 18.1 | 17.6 | 10.4 | 14.6 | 13.6 | 8.2 | 15.3 |
| **03** | 24.0 | 14.8 | 14.1 | 13.2 | 10.4 | 10.3 | 11.4 |
| **04** | 23.5 | 16.6 | 15.6 | 9.4 | 12.8 | 10.8 | 13.6 |
| ***S. galilis*** |  |  |  |  |  |  |  |
| **01** | 21.5 | 18.4 | 14.2 | 13.4 | 10.8 | 9.9 | 14.4 |
| ***S. coni*** |  |  |  |  |  |  |  |
| **01** | 17.4 | 15.2 | 14.9 | 10.8 | 10.5 | 9.5 | 15.7 |
| ***S. simulans*** |  |  |  |  |  |  |  |
| **01** | 20.7 | 17.2 | 14.4 | 12.5 | 11.6 | 11.4 | 14.5 |
| ***S. equorum*** |  |  |  |  |  |  |  |
| **01** | 19.3 | 17.7 | 15.2 | 12.1 | 10.7 | 10.2 | 17.6 |
| **ATCC 25923** |  |  |  |  |  |  |  |
|  | 24.4 | 19.4 | 16.7 | 14.8 | 12.7 | 10.7 | 18.3 |
